# Supplementary material for: ChAdOx1 nCoV-19 vaccine prevents SARS-CoV-2 pneumonia in rhesus macaques
Source: Springer Nature journal article supplement (doi:10.1038/s41586-020-2608-y), 2020-07-30
Supplement: 41586_2020_2608_MOESM1_ESM.pdf [file 41586_2020_2608_MOESM1_ESM.pdf]

---

**Supplementary information**

---

**ChAdOx1 nCoV-19 vaccine prevents SARS-CoV-2 pneumonia in rhesus macaques**

---

In the format provided by the authors and unedited

Figure S1. Gating strategy to determine percentage of CD3+ cells that express cytokines of interest.

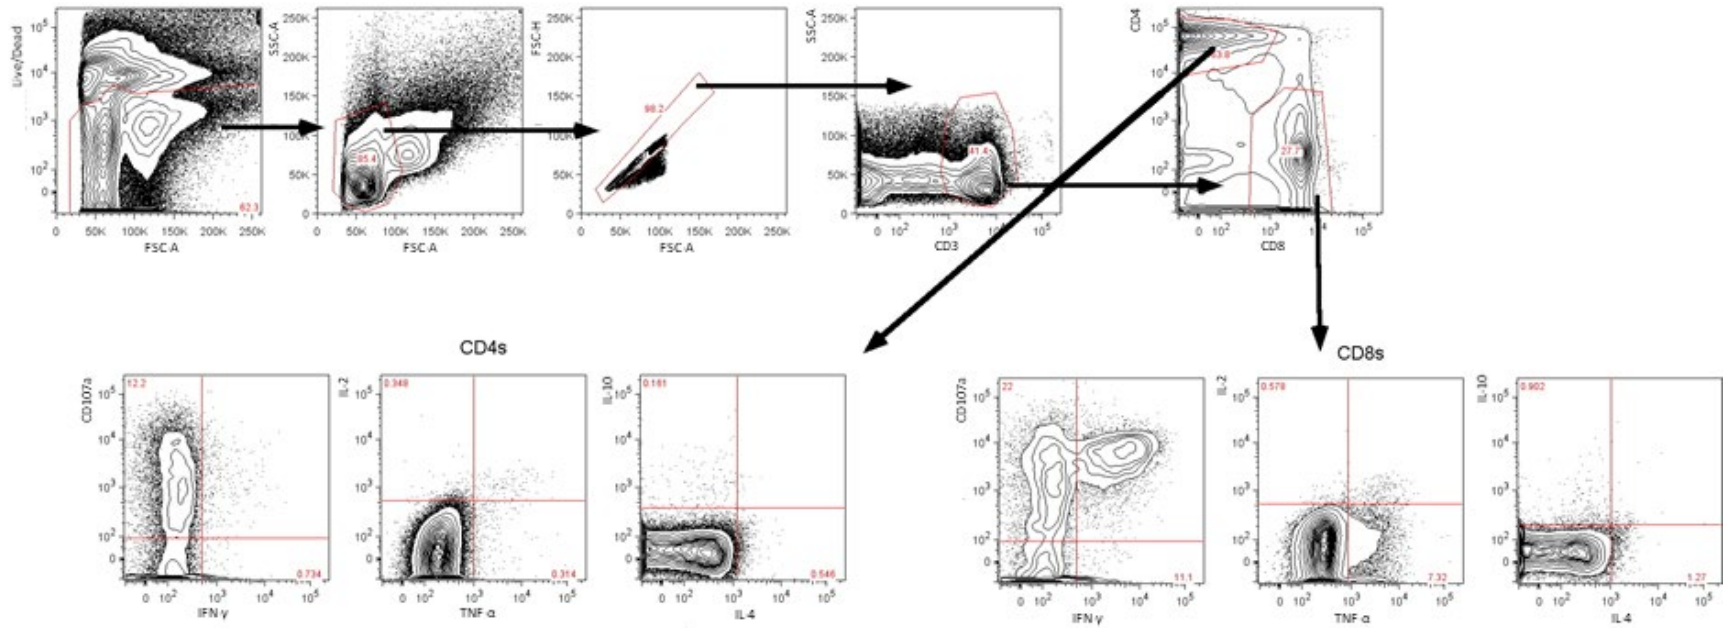

Table S1. Serum biochemistry Analytes Prime ChAdOx1 nCoV-19

| Animal ID | Study Day | BUN (mg/dL) | Creatinine (mg/dL) | ALT (U/L) | ALP (U/L) | AST (U/L) | T Bilirubin (mg/dL) | Glucose (mg/dL) | Calcium (mg/dL) | T Protein (g/dL) | Albumin (g/dL) | Glob (g/dL) | Na+ (mmol/L) | K+ (mmol/L) | CL- (mmol/L) | tCO2 (mmol/L) | Hem | Lip | Ict |
|-----------|-----------|-------------|--------------------|-----------|-----------|-----------|---------------------|-----------------|-----------------|------------------|----------------|-------------|--------------|-------------|--------------|---------------|-----|-----|-----|
| 1         | D-28      | 18          | <0.2               | 32        | 414       | 44        | 0.3                 | 66              | 9.9             | 6.2              | 4.2            | 2.0         | 143          | 3.8         | 107          | 21            | 0   | 0   | 0   |
|           | D-14      | 20          | 0.4                | 33        | 464       | 46        | 0.3                 | 70              | 10.0            | 6.3              | 4.5            | 1.8         | 146          | 3.5         | 108          | 21            | 0   | 0   | 0   |
|           | D0        | 16          | 0.4                | 36        | 494       | 45        | 0.3                 | 71              | 10.2            | 5.9              | 4.4            | 1.5         | 140          | 3.8         | 107          | 21            | 0   | 0   | 0   |
|           | D1        | 9           | 0.3                | 32        | 421       | 37        | 0.4                 | 77              | 9.7             | 5.7              | 4.2            | 1.6         | 145          | 4.1         | 110          | 27            | 0   | 0   | 0   |
|           | D3        | 17          | 0.5                | 35        | 420       | 57        | 0.3                 | 73              | 10.1            | 6.4              | 4.6            | 1.8         | 145          | 3.6         | 111          | 18            | 2   | 0   | 0   |
|           | D5        | 18          | 0.6                | 36        | 388       | 51        | 0.4                 | 62              | 10.3            | 6.1              | 4.5            | 1.6         | 141          | 4.4         | 115          | 27            | 0   | 0   | 0   |
|           | D7        | 17          | 0.6                | 34        | 431       | 44        | 0.4                 | 66              | 10.1            | 6.1              | 4.5            | 1.6         | 145          | 3.6         | 110          | 27            | 0   | 0   | 0   |
| 2         | D-28      | 21          | 0.8                | 32        | 731       | 38        | 0.4                 | 72              | 10.8            | 6.5              | 4.7            | 1.8         | 146          | 4.5         | 108          | 25            | 0   | 0   | 0   |
|           | D-14      | 19          | 0.5                | 29        | 664       | 41        | 0.4                 | 71              | 10.6            | 6.2              | 4.4            | 1.8         | 148          | 3.9         | 108          | 25            | 0   | 0   | 0   |
|           | D0        | 20          | 0.7                | 26        | 771       | 32        | 0.3                 | 73              | 10.8            | 6.4              | 4.5            | 1.9         | 144          | 3.5         | 108          | 20            | 0   | 0   | 0   |
|           | D1        | 20          | 0.3                | 43        | 757       | 39        | 0.4                 | 88              | 11.1            | 6.6              | 4.5            | 2.1         | 147          | 3.8         | 118          | 16            | 0   | 0   | 0   |
|           | D3        | 19          | 0.4                | 37        | 661       | 38        | 0.3                 | 74              | 10.6            | 6.6              | 4.4            | 2.1         | 147          | 4.5         | 112          | 26            | 0   | 0   | 0   |
|           | D5        | 19          | 0.7                | 38        | 675       | 42        | 0.2                 | 70              | 11.1            | 6.6              | 4.7            | 2.0         | 142          | 5.1         | 110          | 27            | 0   | 0   | 0   |
|           | D7        | 15          | 0.6                | 34        | 692       | 43        | 0.3                 | 63              | 10.9            | 6.4              | 4.4            | 1.9         | 147          | 4.7         | 113          | 24            | 0   | 0   | 0   |
| 3         | D-28      | 17          | 0.6                | 28        | 524       | 55        | 0.4                 | 76              | 10.6            | 6.7              | 4.5            | 2.2         | 144          | 4.2         | 108          | 24            | 0   | 0   | 0   |
|           | D-14      | 20          | 0.3                | 29        | 601       | 46        | 0.5                 | 64              | 10.6            | 6.2              | 4.4            | 1.8         | 144          | 3.8         | 107          | 25            | 0   | 0   | 0   |
|           | D0        | 16          | 0.7                | 28        | 711       | 45        | 0.4                 | 75              | 10.7            | 6.3              | 4.5            | 1.7         | 142          | 3.9         | 108          | 22            | 0   | 0   | 0   |
|           | D1        | 15          | 0.6                | 36        | 655       | 46        | 0.6                 | 88              | 10.5            | 6.3              | 4.5            | 1.9         | 143          | 4.2         | 108          | 24            | 0   | 0   | 0   |
|           | D3        | 17          | 0.3                | 30        | 570       | 40        | 0.5                 | 78              | 10.5            | 6.7              | 4.5            | 2.2         | 145          | 4.1         | 111          | 25            | 0   | 0   | 0   |
|           | D5        | 13          | 0.5                | 28        | 590       | 40        | 0.5                 | 76              | 10.2            | 6.4              | 4.6            | 1.8         | 141          | 4.4         | 108          | 28            | 0   | 0   | 0   |
|           | D7        | 12          | 0.7                | 29        | 592       | 46        | 0.6                 | 71              | 10.7            | 6.6              | 4.7            | 1.9         | 145          | 3.9         | 109          | 26            | 0   | 0   | 0   |
| 4         | D-28      | 15          | 0.5                | 26        | 448       | 38        | 0.3                 | 73              | 10.7            | 6.5              | 4.7            | 1.8         | 145          | 4.2         | 108          | 24            | 0   | 0   | 0   |
|           | D-14      | 20          | 0.8                | 25        | 500       | 48        | 0.4                 | 58              | 11.1            | 6.7              | 5.0            | 1.7         | 148          | 4.9         | 109          | 27            | 2   | 0   | 0   |
|           | D0        | 17          | 0.8                | 29        | 498       | 41        | 0.4                 | 65              | 10.8            | 6.2              | 4.7            | 1.5         | 144          | 4.3         | 106          | 28            | 0   | 0   | 0   |
|           | D1        | 14          | 0.6                | 28        | 419       | 31        | 0.4                 | 70              | 10.4            | 5.9              | 4.5            | 1.4         | 144          | 4.0         | 110          | 28            | 0   | 0   | 0   |
|           | D3        | 19          | 0.7                | 30        | 383       | 36        | 0.4                 | 69              | 10.4            | 6.3              | 4.5            | 1.8         | 149          | 4.1         | 113          | 26            | 0   | 0   | 0   |
|           | D5        | 18          | 0.6                | 31        | 376       | 34        | 0.5                 | 69              | 10.4            | 6.2              | 4.5            | 1.7         | 143          | 4.6         | 110          | 28            | 0   | 0   | 0   |
|           | D7        | 15          | 0.7                | 38        | 344       | 40        | 0.4                 | 59              | 9.7             | 5.9              | 4.4            | 1.5         | 148          | 4.1         | 112          | 27            | 0   | 0   | 0   |
| 5         | D-28      | 18          | 0.7                | 32        | 440       | 42        | 0.4                 | 58              | 10.2            | 6.5              | 4.9            | 1.6         | 143          | 4.2         | 106          | 28            | 0   | 0   | 0   |
|           | D-14      | 14          | 0.6                | 27        | 494       | 43        | 0.4                 | 57              | 10.6            | 6.1              | 4.8            | 1.4         | 144          | 4.2         | 110          | 25            | 0   | 0   | 0   |
|           | D0        | 14          | 0.8                | 24        | 604       | 41        | 0.3                 | 52              | 10.8            | 6.2              | 4.9            | 1.3         | 144          | 4.1         | 107          | 26            | 0   | 0   | 0   |
|           | D1        | 13          | 0.6                | 36        | 508       | 46        | 0.3                 | 72              | 10.6            | 5.8              | 4.5            | 1.3         | 145          | 4.1         | 111          | 28            | 0   | 0   | 0   |
|           | D3        | 13          | 0.7                | 43        | 458       | 49        | 0.5                 | 64              | 10.4            | 6.3              | 4.8            | 1.6         | 147          | 4.5         | 112          | 27            | 0   | 0   | 0   |
|           | D5        | 14          | 0.7                | 39        | 452       | 40        | 0.5                 | 67              | 10.4            | 6.5              | 4.9            | 1.6         | 142          | 4.6         | 106          | 29            | 0   | 0   | 0   |
|           | D7        | 12          | 0.7                | 32        | 428       | 43        | 0.4                 | 60              | 10.4            | 6.4              | 4.9            | 1.5         | 145          | 3.8         | 107          | 29            | 0   | 0   | 0   |
| 6         | D-28      | 17          | 0.9                | 98        | 232       | 42        | 0.3                 | 79              | 10.0            | 6.2              | 4.7            | 1.5         | 142          | 3.8         | 109          | 25            | 0   | 0   | 0   |
|           | D-14      | 18          | 0.5                | 46        | 205       | 40        | 0.3                 | 66              | 9.6             | 5.9              | 4.2            | 1.6         | 146          | 3.7         | 108          | 26            | 0   | 0   | 0   |
|           | D0        | 17          | 0.9                | 35        | 213       | 37        | 0.4                 | 76              | 10.2            | 6.1              | 4.5            | 1.7         | 144          | 4.6         | 112          | 24            | 0   | 0   | 0   |
|           | D1        | 18          | 0.9                | 42        | 184       | 47        | 0.4                 | 86              | 10.1            | 5.9              | 4.3            | 1.7         | 140          | 4.6         | 111          | 26            | 0   | 0   | 0   |
|           | D3        | 22          | 0.6                | 50        | 188       | 42        | 0.4                 | 84              | 10.2            | 6.3              | 4.4            | 1.9         | 146          | 4.4         | 113          | 26            | 0   | 0   | 0   |
|           | D5        | 17          | 0.8                | 42        | 169       | 41        | 0.4                 | 88              | 10.1            | 6.2              | 4.2            | 2.0         | 141          | 4.6         | 113          | 28            | 0   | 0   | 0   |
|           | D7        | 18          | 0.7                | 42        | 179       | 40        | 0.4                 | 64              | 9.6             | 6.2              | 4.3            | 1.8         | 145          | 4.1         | 114          | 25            | 0   | 0   | 0   |

Table S2. Serum biochemistry Analytes Prime-boost ChAdOx1 nCoV-19

| Animal ID | Study Day | BUN (mg/dL) | Creatinine (mg/dL) | ALT (U/L) | ALP (U/L) | AST (U/L) | T Bilirubin (mg/dL) | Glucose (mg/dL) | Calcium (mg/dL) | T Protein (g/dL) | Albumin (g/dL) | Glob (g/dL) | Na+ (mmol/L) | K+ (mmol/L) | CL- (mmol/L) | tCO2 (mmol/L) | Hem | Lip | Ict |
|-----------|-----------|-------------|--------------------|-----------|-----------|-----------|---------------------|-----------------|-----------------|------------------|----------------|-------------|--------------|-------------|--------------|---------------|-----|-----|-----|
| 7         | D-56      | 18          | 0.8                | 32        | 386       | 52        | 0.3                 | 65              | 10.7            | 6.9              | 4.8            | 2.1         | 146          | 3.9         | 104          | 24            | 0   | 0   | 0   |
|           | D-42      | 16          | 0.7                | 35        | 471       | 41        | 0.4                 | 57              | 10.5            | 6.6              | 4.8            | 1.8         | 150          | 4.1         | 110          | 26            | 0   | 0   | 0   |
|           | D-28      | 18          | 0.6                | 39        | 514       | 36        | 0.4                 | 68              | 10.9            | 7.0              | 5.0            | 1.9         | 148          | 4.1         | 112          | 27            | 0   | 0   | 0   |
|           | D-14      | 19          | 0.8                | 30        | 508       | 40        | 0.3                 | 66              | 10.5            | 6.6              | 4.9            | 1.7         | 149          | 3.9         | 114          | 26            | 0   | 0   | 0   |
|           | D0        | 14          | 0.5                | 36        | 522       | 40        | 0.4                 | 77              | 10.4            | 6.5              | 4.9            | 1.6         | 145          | 4.3         | 112          | 26            | 0   | 0   | 0   |
|           | D1        | 11          | 0.5                | 37        | 498       | 35        | 0.4                 | 91              | 10.3            | 6.6              | 4.9            | 1.7         | 143          | 4.4         | 119          | 25            | 0   | 0   | 0   |
|           | D3        | 15          | 0.7                | 42        | 485       | 35        | 0.4                 | 83              | 10.3            | 6.7              | 5.0            | 1.7         | 144          | 4.6         | 114          | 28            | 0   | 0   | 0   |
| D5        | 16        | 0.4         | 36                 | 456       | 34        | 0.4       | 83                  | 10.2            | 6.6             | 4.9              | 1.7            | 141         | 4.5          | 114         | 26           | 0             | 0   | 0   |     |
| D7        | 12        | 0.7         | 33                 | 524       | 39        | 0.4       | 72                  | 10.6            | 6.4             | 4.8              | 1.6            | 147         | 4.1          | 112         | 20           | 0             | 0   | 0   |     |
| 8         | D-56      | 21          | <0.2               | 76        | 253       | 54        | 0.3                 | 55              | 10.7            | 7.3              | 4.3            | 3.1         | 145          | 5.2         | 105          | 22            | 0   | 0   | 0   |
|           | D-42      | 17          | 0.6                | 57        | 277       | 42        | 0.4                 | 53              | 9.6             | 7.4              | 4.3            | 3.1         | 147          | 4.7         | 109          | 24            | 0   | 0   | 0   |
|           | D-28      | 17          | 0.5                | 49        | 317       | 36        | 0.4                 | 64              | 10.0            | 7.7              | 4.5            | 3.1         | 142          | 4.1         | 108          | 15            | 0   | 0   | 0   |
|           | D-14      | 21          | 0.5                | 51        | 238       | 40        | 0.4                 | 69              | 10.9            | 7.8              | 4.4            | 3.4         | 146          | 4.7         | 110          | 14            | 0   | 0   | 0   |
|           | D0        | 16          | 0.6                | 37        | 335       | 36        | 0.4                 | 60              | 10.7            | 8.5              | 4.7            | 3.8         | 141          | 4.7         | 111          | 16            | 0   | 0   | 0   |
|           | D1        | 12          | 0.6                | 38        | 325       | 32        | 0.4                 | 78              | 10.3            | 8.5              | 4.7            | 3.9         | 141          | 4.8         | 113          | 20            | 0   | 0   | 0   |
|           | D3        | 15          | 0.7                | 41        | 345       | 33        | 0.4                 | 67              | 10.1            | 8.6              | 4.7            | 4.0         | 140          | 4.5         | 111          | 17            | 0   | 0   | 0   |
| D5        | 17        | 0.7         | 38                 | 321       | 35        | 0.4       | 75                  | 10.1            | 8.5             | 4.7              | 3.8            | 142         | 4.8          | 111         | 16           | 0             | 0   | 0   |     |
| D7        | 10        | 0.5         | 33                 | 414       | 43        | 0.4       | 42                  | 10.2            | 7.6             | 4.3              | 3.3            | 144         | 4.2          | 110         | 21           | 0             | 0   | 0   |     |
| 9         | D-56      | 21          | 0.8                | 48        | 716       | 47        | 0.3                 | 71              | 11.3            | 6.3              | 4.4            | 1.8         | 146          | 4.4         | 106          | 27            | 0   | 0   | 0   |
|           | D-42      | 16          | 0.7                | 32        | 812       | 38        | 0.4                 | 63              | 10.7            | 6.5              | 4.6            | 1.9         | 145          | 3.9         | 110          | 26            | 0   | 0   | 0   |
|           | D-28      | 18          | 0.8                | 43        | 882       | 41        | 0.4                 | 70              | 11.4            | 6.7              | 4.9            | 1.8         | 147          | 4.2         | 109          | 26            | 0   | 0   | 0   |
|           | D-14      | 24          | 0.5                | 42        | 797       | 43        | 0.4                 | 77              | 10.9            | 6.3              | 4.7            | 1.7         | 149          | 4.5         | 113          | 26            | 0   | 0   | 0   |
|           | D0        | 18          | 0.8                | 40        | 880       | 40        | 0.4                 | 73              | 10.8            | 6.5              | 4.6            | 1.9         | 146          | 4.0         | 110          | 28            | 0   | 0   | 0   |
|           | D1        | 12          | 0.5                | 46        | 864       | 43        | 0.5                 | 76              | 10.5            | 6.3              | 4.5            | 1.8         | 146          | 4.5         | 116          | 28            | 0   | 0   | 0   |
|           | D3        | 13          | 0.8                | 49        | 933       | 39        | 0.5                 | 81              | 10.3            | 6.9              | 4.8            | 2.1         | 145          | 4.4         | 111          | 26            | 0   | 0   | 0   |
| D5        | 19        | 0.9         | 43                 | 824       | 35        | 0.5       | 75                  | 10.8            | 6.8             | 4.8              | 2.0            | 144         | 4.5          | 111         | 28           | 0             | 0   | 0   |     |
| D7        | 10        | 0.7         | 58                 | 969       | 106       | 0.4       | 60                  | 10.7            | 6.6             | 4.8              | 1.7            | 148         | 4.1          | 111         | 26           | 0             | 0   | 0   |     |
| 10        | D-56      | 21          | 0.5                | 81        | 457       | 83        | 0.3                 | 57              | 10.6            | 6.9              | 4.1            | 2.8         | 148          | 4.8         | 108          | 21            | 0   | 0   | 0   |
|           | D-42      | 15          | 0.4                | 75        | 418       | 61        | 0.4                 | 64              | 10.4            | 6.5              | 4.0            | 2.5         | 145          | 4.4         | 110          | 24            | 2   | 0   | 0   |
|           | D-28      | 18          | 0.6                | 54        | 464       | 52        | 0.4                 | 69              | 10.9            | 7.3              | 4.4            | 2.9         | 148          | 3.9         | 109          | 19            | 1   | 0   | 0   |
|           | D-14      | 22          | 0.4                | 56        | 342       | 55        | 0.4                 | 69              | 10.2            | 6.7              | 4.0            | 2.6         | 149          | 4.1         | 110          | 24            | 0   | 0   | 0   |
|           | D0        | 17          | 0.7                | 66        | 365       | 56        | 0.4                 | 69              | 10.1            | 6.8              | 4.1            | 2.7         | 143          | 4.3         | 112          | 25            | 0   | 0   | 0   |
|           | D1        | 16          | 0.6                | 67        | 361       | 50        | 0.4                 | 78              | 10.3            | 6.9              | 4.0            | 2.8         | 145          | 4.8         | 115          | 24            | 0   | 0   | 0   |
|           | D3        | 15          | 0.5                | 69        | 367       | 49        | 0.4                 | 77              | 10.4            | 7.1              | 4.2            | 2.9         | 146          | 4.6         | 115          | 28            | 0   | 0   | 0   |
| D5        | 21        | 0.3         | 64                 | 347       | 53        | 0.4       | 72                  | 9.9             | 7.1             | 4.2              | 2.9            | 143         | 4.8          | 113         | 24           | 0             | 0   | 0   |     |
| D7        | 14        | 0.8         | 63                 | 418       | 57        | 0.2       | 56                  | 10.1            | 6.5             | 3.9              | 2.7            | 146         | 4.2          | 111         | 24           | 0             | 0   | 0   |     |
| 11        | D-56      | 16          | 0.5                | 17        | 256       | 33        | 0.3                 | 60              | 10.6            | 6.6              | 4.3            | 2.3         | 146          | 4.0         | 108          | 31            | 0   | 0   | 0   |
|           | D-42      | 12          | 0.6                | 18        | 359       | 32        | 0.5                 | 65              | 10.8            | 6.7              | 4.7            | 1.9         | 144          | 3.5         | 110          | 29            | 0   | 0   | 0   |
|           | D-28      | 12          | 0.7                | 28        | 507       | 32        | 0.3                 | 79              | 11.1            | 6.8              | 4.8            | 2.0         | 144          | 3.6         | 108          | 27            | 0   | 0   | 0   |
|           | D-14      | 15          | 0.7                | 24        | 533       | 30        | 0.5                 | 63              | 10.8            | 6.6              | 4.6            | 1.9         | 145          | 3.6         | 110          | 28            | 0   | 0   | 0   |
|           | D0        | 11          | 0.5                | 19        | 541       | 31        | 0.5                 | 73              | 10.6            | 6.4              | 4.6            | 1.8         | 142          | 3.7         | 112          | 28            | 0   | 0   | 0   |
|           | D1        | 8           | 0.5                | 28        | 529       | 34        | 0.5                 | 81              | 10.4            | 6.6              | 4.7            | 1.8         | 142          | 4.2         | 114          | 29            | 0   | 0   | 0   |
|           | D3        | 9           | 0.6                | 33        | 487       | 26        | 0.5                 | 84              | 10.7            | 6.7              | 4.8            | 1.9         | 143          | 4.2         | 118          | 28            | 0   | 0   | 0   |
| D5        | 9         | 0.4         | 27                 | 427       | 27        | 0.4       | 87                  | 10.8            | 6.7             | 4.5              | 2.1            | 142         | 4.2          | 112         | 29           | 0             | 0   | 0   |     |
| D7        | 8         | 0.6         | 28                 | 475       | 105       | 0.4       | 78                  | 10.6            | 6.6             | 4.5              | 2.1            | 146         | 4.0          | 110         | 27           | 0             | 0   | 0   |     |
| 12        | D-56      | 29          | 0.9                | 83        | 432       | 83        | 0.4                 | 67              | 10.2            | 6.3              | 4.5            | 1.7         | 140          | 4.1         | 106          | 13            | 0   | 0   | 0   |
|           | D-42      | 26          | 0.7                | 78        | 454       | 60        | 0.5                 | 68              | 10.4            | 6.1              | 4.4            | 1.7         | 145          | 5.2         | 110          | 22            | 2   | 0   | 0   |
|           | D-28      | 23          | 0.8                | 62        | 438       | 47        | 0.6                 | 77              | 10.5            | 6.8              | 4.9            | 2.0         | 141          | 3.8         | 105          | 13            | 0   | 0   | 0   |
|           | D-14      | 27          | 1.1                | 92        | 425       | 68        | 0.6                 | 64              | 10.3            | 6.6              | 4.8            | 1.8         | 146          | 4.1         | 114          | 21            | 0   | 0   | 0   |
|           | D0        | 26          | 0.6                | 93        | 401       | 52        | 0.5                 | 69              | 10.4            | 6.5              | 4.7            | 1.8         | 142          | 4.0         | 113          | 20            | 0   | 0   | 0   |
|           | D1        | 21          | 0.7                | 98        | 396       | 68        | 0.4                 | 87              | 10.1            | 6.4              | 4.6            | 1.8         | 142          | 4.6         | 111          | 16            | 0   | 0   | 0   |
|           | D3        | 21          | 0.7                | 91        | 337       | 46        | 0.5                 | 66              | 9.8             | 6.6              | 4.6            | 2.0         | 142          | 4.2         | 112          | 19            | 0   | 0   | 0   |
| D5        | 25        | 0.7         | 78                 | 336       | 41        | 0.5       | 60                  | 10.1            | 6.6             | 4.6              | 2.0            | 139         | 4.3          | 111         | 19           | 0             | 0   | 0   |     |
| D7        | 15        | 0.7         | 70                 | 400       | 42        | 0.4       | 63                  | 10.3            | 6.5             | 4.6              | 1.9            | 143         | 4.2          | 112         | 19           | 0             | 0   | 0   |     |

Table S3. Serum biochemistry Analytes ChAdOx1 GFP

| Animal ID | Study Day | BUN (mg/dL) | Creatinine (mg/dL) | ALT (U/L) | ALP (U/L) | AST (U/L) | T Bilirubin (mg/dL) | Glucose (mg/dL) | Calcium (mg/dL) | T Protein (g/dL) | Albumin (g/dL) | Glob (g/dL) | Na+ (mmol/L) | K+ (mmol/L) | CL- (mmol/L) | tCO2 (mmol/L) | Hem | Lip | Ict |
|-----------|-----------|-------------|--------------------|-----------|-----------|-----------|---------------------|-----------------|-----------------|------------------|----------------|-------------|--------------|-------------|--------------|---------------|-----|-----|-----|
| 13        | D-28      | 13          | 0.6                | 48        | 563       | 45        | 0.4                 | 75              | 10.4            | 6.4              | 4.1            | 2.3         | 145          | 3.8         | 109          | 23            | 2   | 0   | 0   |
|           | D-14      | 16          | 0.3                | 67        | 609       | 44        | 0.4                 | 71              | 10.1            | 6.7              | 4.4            | 2.2         | 145          | 3.7         | 109          | 23            | 0   | 0   | 0   |
|           | D0        | 15          | 0.6                | 49        | 753       | 40        | 0.4                 | 88              | 10.1            | 6.6              | 4.5            | 2.1         | 146          | 4.1         | 111          | 14            | 0   | 0   | 0   |
|           | D1        | 12          | 0.7                | 50        | 651       | 39        | 0.4                 | 77              | 10.2            | 6.4              | 4.3            | 2.1         | 146          | 4.2         | 112          | 18            | 0   | 0   | 0   |
|           | D3        | 15          | 0.7                | 52        | 590       | 39        | 0.4                 | 84              | 10.1            | 6.8              | 4.4            | 2.4         | 148          | 4.1         | 110          | 22            | 0   | 0   | 0   |
|           | D5        | 12          | 0.8                | 46        | 565       | 34        | 0.4                 | 80              | 10.1            | 6.3              | 4.4            | 2.0         | 147          | 4.2         | 112          | 25            | 0   | 0   | 0   |
|           | D7        | 11          | 0.8                | 47        | 671       | 38        | 0.4                 | 67              | 10.0            | 6.3              | 4.4            | 1.9         | 143          | 4.1         | 111          | 29            | 0   | 0   | 0   |
| 14        | D-29      | 20          | 0.7                | 30        | 580       | 38        | 0.4                 | 66              | 11.5            | 6.6              | 5.0            | 1.6         | 147          | 4.2         | 107          | 25            | 0   | 0   | 0   |
|           | D-15      | 16          | 0.5                | 27        | 585       | 39        | 0.5                 | 59              | 11.3            | 6.6              | 5.0            | 1.6         | 148          | 4.5         | 109          | 23            | 1   | 0   | 0   |
|           | D0        | 15          | 0.8                | 29        | 639       | 27        | 0.4                 | 72              | 11.0            | 6.6              | 5.2            | 1.4         | 144          | 4.0         | 111          | 25            | 0   | 0   | 0   |
|           | D1        | 17          | 0.8                | 22        | 548       | 29        | 0.5                 | 82              | 10.8            | 6.2              | 4.9            | 1.3         | 142          | 3.9         | 110          | 25            | 0   | 0   | 0   |
|           | D3        | 13          | 0.8                | 41        | 506       | 51        | 0.4                 | 75              | 10.4            | 6.6              | 4.9            | 1.7         | 149          | 4.5         | 114          | 26            | 0   | 0   | 0   |
|           | D5        | 15          | 0.7                | 33        | 417       | 32        | 0.4                 | 68              | 10.6            | 6.4              | 4.8            | 1.6         | 146          | 4.1         | 112          | 27            | 0   | 0   | 0   |
|           | D7        | 14          | 0.8                | 32        | 425       | 30        | 0.4                 | 56              | 10.2            | 6.2              | 4.6            | 1.6         | 144          | 3.7         | 112          | 25            | 0   | 0   | 0   |
| 15        | D-29      | 26          | 0.9                | 35        | 454       | 51        | 0.3                 | 60              | 11.1            | 6.3              | 4.4            | 1.9         | 153          | 3.9         | 108          | 24            | 0   | 0   | 0   |
|           | D-15      | 21          | 0.7                | 32        | 578       | 42        | 0.5                 | 87              | 10.8            | 6.7              | 4.7            | 2.1         | 147          | 3.6         | 109          | 19            | 0   | 0   | 0   |
|           | D0        | 20          | 1.0                | 33        | 647       | 35        | 0.4                 | 82              | 10.7            | 6.6              | 4.7            | 1.8         | 141          | 4.0         | 111          | 21            | 0   | 0   | 0   |
|           | D1        | 16          | 0.6                | 35        | 546       | 39        | 0.5                 | 99              | 10.6            | 5.9              | 4.3            | 1.6         | 149          | 3.9         | 116          | 26            | 0   | 0   | 0   |
|           | D3        | 19          | 0.9                | 41        | 510       | 42        | 0.5                 | 90              | 10.4            | 6.4              | 4.4            | 1.9         | 148          | 3.9         | 113          | 21            | 0   | 0   | 0   |
|           | D5        | 18          | 0.8                | 31        | 417       | 30        | 0.5                 | 79              | 10.1            | 6.1              | 4.3            | 1.7         | 144          | 4.0         | 112          | 26            | 0   | 0   | 0   |
|           | D7        | 19          | 0.6                | 34        | 464       | 35        | 0.5                 | 72              | 9.9             | 6.1              | 4.4            | 1.7         | 144          | 4.1         | 110          | 26            | 0   | 0   | 0   |
| 16        | D-56      | 18          | 0.6                | 26        | 567       | 44        | 0.2                 | 74              | 11.1            | 6.8              | 4.5            | 2.2         | 150          | 4.7         | 105          | 24            | 2   | 0   | 0   |
|           | D-42      | 11          | 0.6                | 18        | 720       | 39        | 0.4                 | 67              | 10.9            | 6.9              | 4.8            | 2.1         | 150          | 5.1         | 110          | 27            | 0   | 0   | 0   |
|           | D-28      | 14          | 0.7                | 22        | 695       | 36        | 0.3                 | 81              | 11.0            | 6.7              | 4.8            | 1.9         | 147          | 4.1         | 110          | 25            | 0   | 0   | 0   |
|           | D-14      | 17          | 0.3                | 26        | 606       | 32        | 0.4                 | 83              | 10.4            | 6.4              | 4.7            | 1.7         | 146          | 3.8         | 111          | 25            | 0   | 0   | 0   |
|           | D0        | 14          | 0.4                | 21        | 730       | 37        | 0.4                 | 83              | 10.4            | 6.8              | 4.7            | 2.0         | 146          | 4.2         | 110          | 22            | 0   | 0   | 0   |
|           | D1        | 14          | 0.6                | 28        | 662       | 32        | 0.4                 | 82              | 10.2            | 6.4              | 4.5            | 1.9         | 147          | 4.3         | 113          | 25            | 0   | 0   | 0   |
|           | D3        | 15          | 0.6                | 32        | 739       | 33        | 0.3                 | 85              | 10.2            | 6.6              | 4.9            | 1.8         | 146          | 4.5         | 116          | 25            | 0   | 0   | 0   |
| 17        | D5        | 12          | 0.2                | 28        | 605       | 27        | 0.4                 | 82              | 10.5            | 6.7              | 4.7            | 2.0         | 147          | 4.3         | 110          | 25            | 0   | 0   | 0   |
|           | D7        | 10          | 0.7                | 29        | 636       | 38        | 0.3                 | 73              | 10.3            | 6.5              | 4.9            | 1.7         | 142          | 4.8         | 109          | 28            | 0   | 0   | 0   |
|           | D-28      | 21          | 0.8                | 26        | 472       | 28        | 0.2                 | 73              | 10.9            | 6.4              | 4.8            | 1.7         | 147          | 4.3         | 107          | 28            | 0   | 0   | 0   |
|           | D-14      | 22          | 0.8                | 28        | 517       | 25        | 0.4                 | 83              | 10.8            | 6.6              | 4.9            | 1.7         | 145          | 4.4         | 108          | 26            | 0   | 0   | 0   |
|           | D0        | 16          | 0.7                | 26        | 610       | 34        | 0.4                 | 69              | 10.6            | 6.5              | 4.9            | 1.6         | 146          | 5.0         | 111          | 26            | 2   | 0   | 0   |
|           | D1        | 15          | 0.8                | 36        | 582       | 37        | 0.4                 | 87              | 10.3            | 6.4              | 4.8            | 1.6         | 147          | 4.1         | 114          | 25            | 0   | 0   | 0   |
|           | D3        | 14          | 1.1                | 49        | 529       | 36        | 0.5                 | 77              | 10.0            | 6.5              | 4.8            | 1.7         | 145          | 4.5         | 113          | 28            | 0   | 0   | 0   |
| 18        | D5        | 15          | 0.7                | 34        | 508       | 28        | 0.4                 | 79              | 10.2            | 6.7              | 4.9            | 1.8         | 144          | 4.5         | 108          | 25            | 0   | 0   | 0   |
|           | D7        | 13          | 1.0                | 30        | 618       | 29        | 0.4                 | 76              | 10.6            | 6.8              | 5.0            | 1.8         | 149          | 4.8         | 113          | 26            | 0   | 0   | 0   |
|           | D-28      | 19          | 0.5                | 20        | 455       | 24        | 0.4                 | 76              | 11.0            | 6.4              | 4.7            | 1.8         | 147          | 4.0         | 108          | 28            | 0   | 0   | 0   |
|           | D-14      | 24          | 0.5                | 24        | 453       | 23        | 0.4                 | 78              | 10.7            | 6.4              | 4.7            | 1.7         | 147          | 4.0         | 113          | 27            | 0   | 0   | 0   |
|           | D0        | 20          | 0.6                | 21        | 512       | 24        | 0.4                 | 73              | 10.8            | 6.4              | 4.6            | 1.8         | 147          | 4.1         | 110          | 25            | 0   | 0   | 0   |
|           | D1        | 17          | 0.6                | 26        | 463       | 42        | 0.4                 | 96              | 10.5            | 6.0              | 4.4            | 1.6         | 146          | 4.7         | 113          | 27            | 1   | 0   | 0   |
|           | D3        | 18          | 0.7                | 46        | 407       | 36        | 0.4                 | 89              | 10.4            | 6.4              | 4.5            | 1.9         | 146          | 4.2         | 110          | 26            | 1   | 0   | 0   |
| 18        | D5        | 14          | 0.6                | 35        | 377       | 25        | 0.4                 | 90              | 9.5             | 6.4              | 4.7            | 1.8         | 145          | 3.9         | 111          | 25            | 0   | 0   | 0   |
|           | D7        | 14          | 0.6                | 28        | 484       | 27        | 0.4                 | 88              | 10.8            | 6.5              | 4.6            | 1.9         | 147          | 4.7         | 111          | 27            | 0   | 0   | 0   |
